# Supplementary material
Source: publisher figshare collection journal article supplement (https://karger.figshare.com/ndownloader/files/30833146)
Supplement: Supplementary file 1 [file 30833146]

**Legends**

**Supplementary figure:**

Fig. S1. Forest plot comparing mean decayed teeth score among Indigenous population vs. non-Indigenous population

Fig. S2. Forest plot comparing mean missing teeth score among Indigenous population vs. non-Indigenous population.

Fig. S3. Forest plot comparing mean filled teeth score among Indigenous population vs. non-Indigenous population.

Fig. S4. Forest plot of subgroup analysis by country type comparing mean DMFT score among Indigenous population vs. non-Indigenous population.

Fig. S5. Forest plot of subgroup analysis by country type comparing mean dmft score among Indigenous children vs. non-Indigenous children.

Fig. S6. Funnel plot of studies reporting mean DMFT score.

Fig. S7. Funnel plot of studies reporting mean dmft score.

Fig. S8. Funnel plot of studies reporting mean decayed teeth score.

Fig. S9. Funnel plot of studies reporting mean missing teeth score.

Fig. S10. Funnel plot of studies reporting mean filled teeth score.

Fig. S11. Funnel plot of studies reporting mean prevalence of dental caries.
